# Supplementary material
Source: bioRxiv or medRxiv preprint supplement (https://www.biorxiv.org/highwire/filestream/75265/field_highwire_adjunct_files/1/246009-2.pdf)
Supplement: Supplementary file [file 246009-2.pdf]

| Authors and Publication year                            | No. of participants (Gender split)                                                                            | Participants' age in years: mean and/or range                                                                      | Coordinates of group differences in FA where controls>dyslexics: MNI, mm <sup>3</sup> |        |       | Coordinates of group differences in FA where dyslexics>controls: MNI, mm <sup>3</sup> |     |     |
|---------------------------------------------------------|---------------------------------------------------------------------------------------------------------------|--------------------------------------------------------------------------------------------------------------------|---------------------------------------------------------------------------------------|--------|-------|---------------------------------------------------------------------------------------|-----|-----|
| Rimrodt, Peterson, Denckla, Kaufmann and Cutting (2010) | 31 participants:<br>• 14 dyslexics (7M, 7F)<br>• 17 typically developing controls (9M, 8F)                    | • Overall range: 7-16<br>• Dyslexics: mean=11.0<br>• Controls: mean=11.0                                           | -54                                                                                   | 4      | 30    | -44                                                                                   | 0   | -10 |
|                                                         |                                                                                                               |                                                                                                                    | -46                                                                                   | -32    | 18    | 50                                                                                    | -16 | -28 |
|                                                         |                                                                                                               |                                                                                                                    | 58                                                                                    | 6      | 34    | 34                                                                                    | -32 | 52  |
|                                                         |                                                                                                               |                                                                                                                    |                                                                                       |        |       | 46                                                                                    | -70 | -16 |
|                                                         |                                                                                                               |                                                                                                                    |                                                                                       |        |       | 18                                                                                    | 20  | -8  |
|                                                         |                                                                                                               |                                                                                                                    |                                                                                       |        |       | 2                                                                                     | -4  | -22 |
| Steinbrink et al. (2008)                                | 16 participants:<br>• 8 dyslexics (6M, 2F)<br>• 8 healthy controls (6M, 2F)                                   | • Dyslexics: mean=20.1<br>• Healthy controls: mean=23.7                                                            | -21                                                                                   | 27     | 6     |                                                                                       |     |     |
|                                                         |                                                                                                               |                                                                                                                    | -30                                                                                   | 0      | 9     |                                                                                       |     |     |
|                                                         |                                                                                                               |                                                                                                                    | -33                                                                                   | -7     | 6     |                                                                                       |     |     |
|                                                         |                                                                                                               |                                                                                                                    | -24                                                                                   | -87    | 15    |                                                                                       |     |     |
|                                                         |                                                                                                               |                                                                                                                    | 30                                                                                    | 0      | 15    |                                                                                       |     |     |
|                                                         |                                                                                                               |                                                                                                                    |                                                                                       |        |       | 58                                                                                    | -48 | 10  |
| Richards et al. (2008)                                  | 21 participants:<br>• 14 dyslexics (14M)<br>• 7 healthy normal readers (7M)                                   | • Overall: range=30-45                                                                                             | -35                                                                                   | -7     | 38    | -44                                                                                   | 8   | 33  |
|                                                         |                                                                                                               |                                                                                                                    | 52                                                                                    | 0      | 21    | -39                                                                                   | 26  | -14 |
|                                                         |                                                                                                               |                                                                                                                    | 19                                                                                    | 55     | 17    | 37                                                                                    | -41 | -24 |
|                                                         |                                                                                                               |                                                                                                                    | 36                                                                                    | 36     | 17    | -47                                                                                   | -23 | 45  |
|                                                         |                                                                                                               |                                                                                                                    | 55                                                                                    | 19     | 0     | -54                                                                                   | 2   | -32 |
|                                                         |                                                                                                               |                                                                                                                    | 38                                                                                    | 43     | 1     | 61                                                                                    | -11 | -16 |
|                                                         |                                                                                                               |                                                                                                                    | -47                                                                                   | 38     | -12   | -45                                                                                   | -21 | -33 |
|                                                         |                                                                                                               |                                                                                                                    | 51                                                                                    | 36     | -8    | 41                                                                                    | -60 | -39 |
|                                                         |                                                                                                               |                                                                                                                    | 14                                                                                    | 3      | 61    | -42                                                                                   | -63 | -48 |
|                                                         |                                                                                                               |                                                                                                                    | 9                                                                                     | -94    | 12    | -33                                                                                   | -52 | -42 |
|                                                         |                                                                                                               |                                                                                                                    | -10                                                                                   | -89    | -17   |                                                                                       |     |     |
|                                                         |                                                                                                               |                                                                                                                    | -20                                                                                   | -90    | 18    |                                                                                       |     |     |
|                                                         |                                                                                                               |                                                                                                                    | 26                                                                                    | -76    | 26    |                                                                                       |     |     |
|                                                         |                                                                                                               |                                                                                                                    | 42                                                                                    | -77    | 18    |                                                                                       |     |     |
|                                                         |                                                                                                               |                                                                                                                    | -20                                                                                   | -84    | -19   |                                                                                       |     |     |
|                                                         |                                                                                                               |                                                                                                                    | 41                                                                                    | -11    | -32   |                                                                                       |     |     |
|                                                         |                                                                                                               |                                                                                                                    | -52                                                                                   | -19    | 30    |                                                                                       |     |     |
|                                                         |                                                                                                               |                                                                                                                    | 53                                                                                    | -1     | 22    |                                                                                       |     |     |
|                                                         |                                                                                                               |                                                                                                                    | -14                                                                                   | -72    | 47    |                                                                                       |     |     |
|                                                         |                                                                                                               |                                                                                                                    | -30                                                                                   | -43    | 45    |                                                                                       |     |     |
|                                                         |                                                                                                               |                                                                                                                    | 47                                                                                    | -47    | 40    |                                                                                       |     |     |
|                                                         |                                                                                                               |                                                                                                                    | -10                                                                                   | -72    | 48    |                                                                                       |     |     |
|                                                         |                                                                                                               |                                                                                                                    | -17                                                                                   | 11     | 2     |                                                                                       |     |     |
| -48                                                     | -33                                                                                                           | 8                                                                                                                  |                                                                                       |        |       |                                                                                       |     |     |
| -23                                                     | 15                                                                                                            | -31                                                                                                                |                                                                                       |        |       |                                                                                       |     |     |
| -47                                                     | -34                                                                                                           | 8                                                                                                                  |                                                                                       |        |       |                                                                                       |     |     |
| -60                                                     | -54                                                                                                           | -19                                                                                                                |                                                                                       |        |       |                                                                                       |     |     |
| 41                                                      | -9                                                                                                            | -33                                                                                                                |                                                                                       |        |       |                                                                                       |     |     |
| -14                                                     | -1                                                                                                            | 36                                                                                                                 |                                                                                       |        |       |                                                                                       |     |     |
| -17                                                     | 11                                                                                                            | 2                                                                                                                  |                                                                                       |        |       |                                                                                       |     |     |
| -16                                                     | -4                                                                                                            | 40                                                                                                                 |                                                                                       |        |       |                                                                                       |     |     |
| -18                                                     | -47                                                                                                           | 33                                                                                                                 |                                                                                       |        |       |                                                                                       |     |     |
| -46                                                     | -28                                                                                                           | -12                                                                                                                |                                                                                       |        |       |                                                                                       |     |     |
| -37                                                     | -23                                                                                                           | 32                                                                                                                 |                                                                                       |        |       |                                                                                       |     |     |
| -21                                                     | 9                                                                                                             | 20                                                                                                                 |                                                                                       |        |       |                                                                                       |     |     |
| Deutsch et al. (2005)                                   | 14 participants:<br>• 7 poor readers with previous dyslexia diagnosis (6M, 1F)<br>• 7 normal readers (6M, 1F) | • Overall: range=7-13<br>• Poor readers with previous dyslexia diagnosis: mean=11.0<br>• Normal readers: mean=10.4 | -28.3                                                                                 | -25.14 | 23.88 |                                                                                       |     |     |
|                                                         |                                                                                                               |                                                                                                                    | 30.96                                                                                 | -44.26 | 30.39 |                                                                                       |     |     |
|                                                         |                                                                                                               |                                                                                                                    | -22.15                                                                                | 24.29  | 20.46 |                                                                                       |     |     |
| Klingberg et al. (2000)                                 | 17 participants:<br>• 6 poor readers with history of dyslexia (5M, 1F)<br>• 11 controls (6M, 5F)              | • Poor readers with history of dyslexia: mean=31.5<br>• Controls: mean=23.1                                        | -31.47                                                                                | -29.84 | 16.45 |                                                                                       |     |     |
